# Supplementary material
Source: PubMed Central journal article supplement (PMC9097780)

A

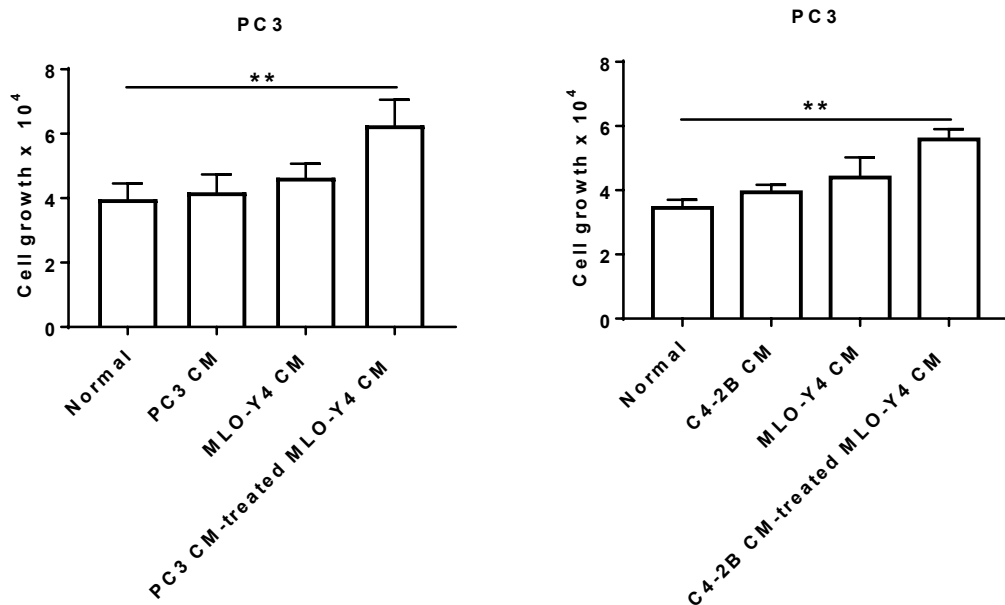

B

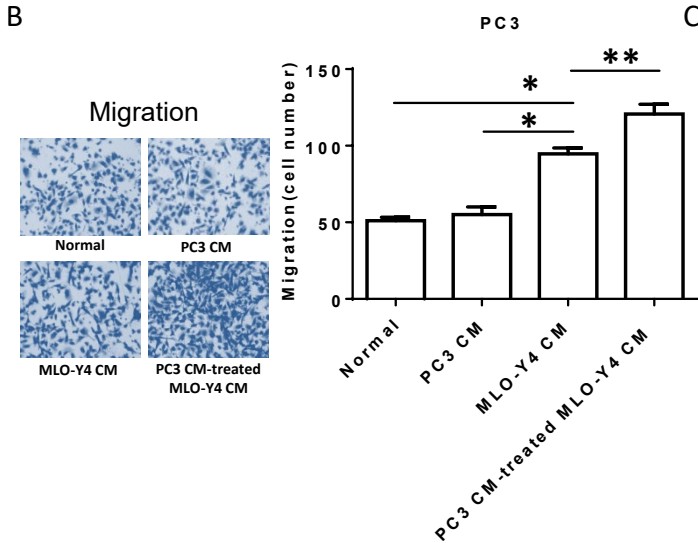

C

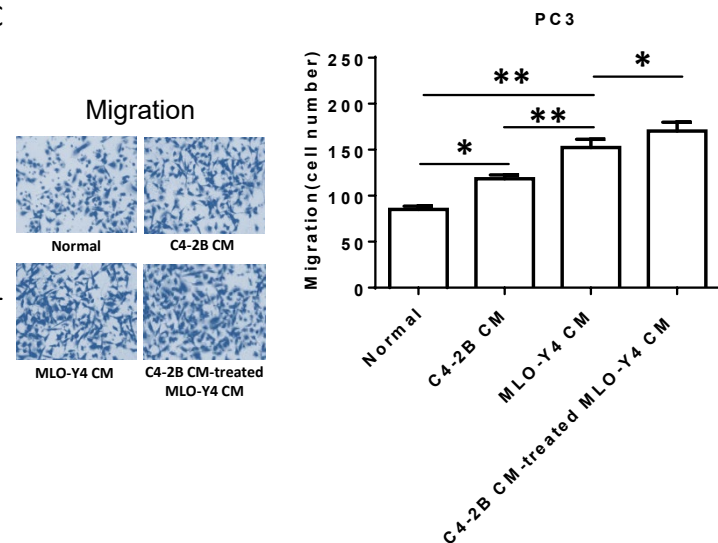

B

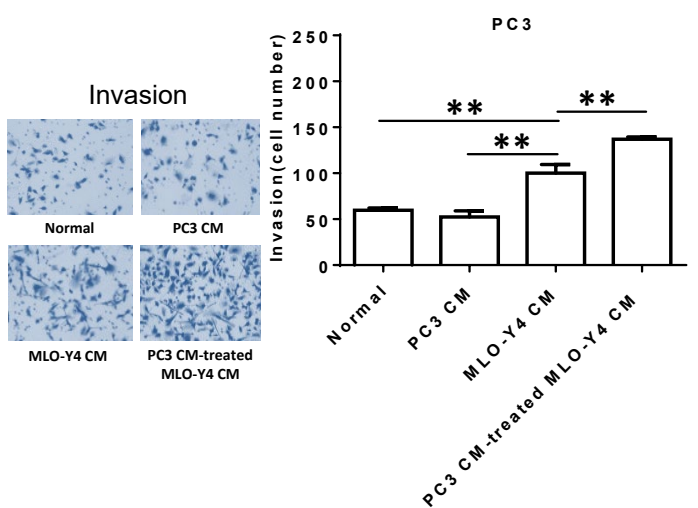

C

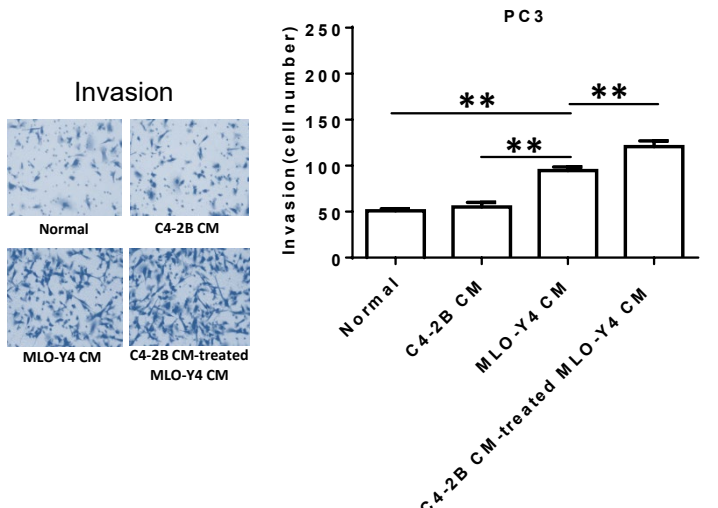

A

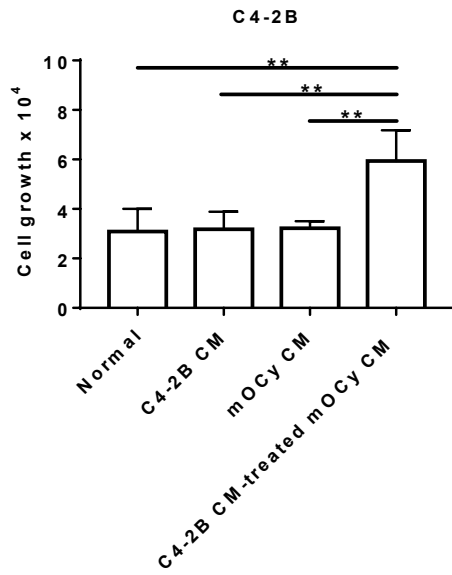

B

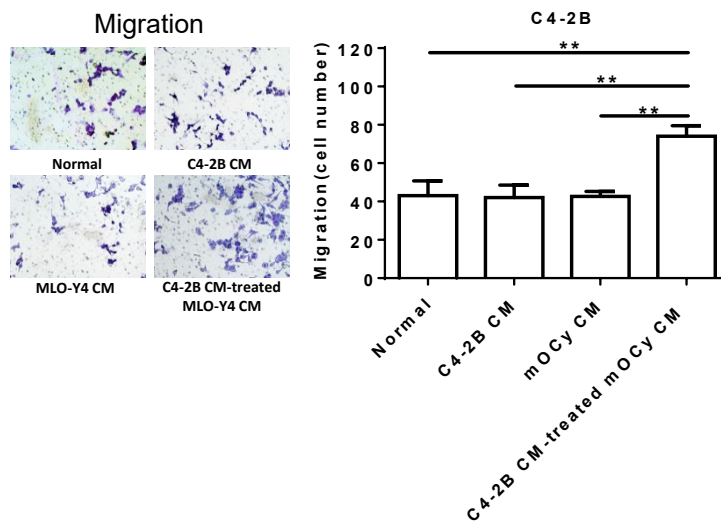

C

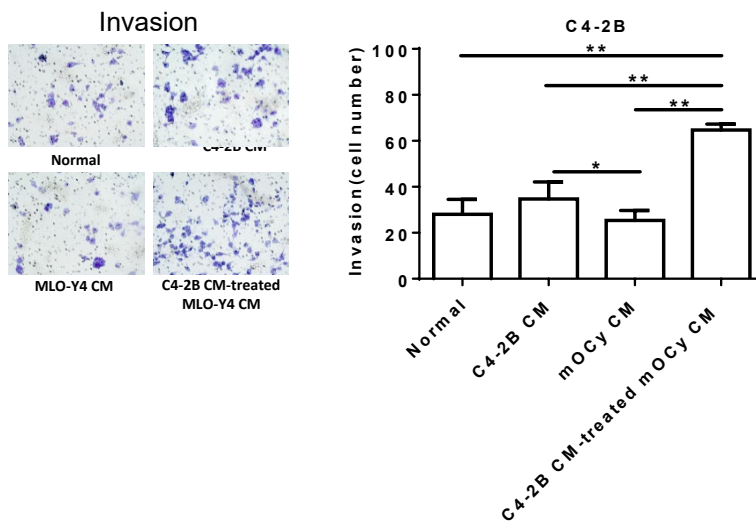

A

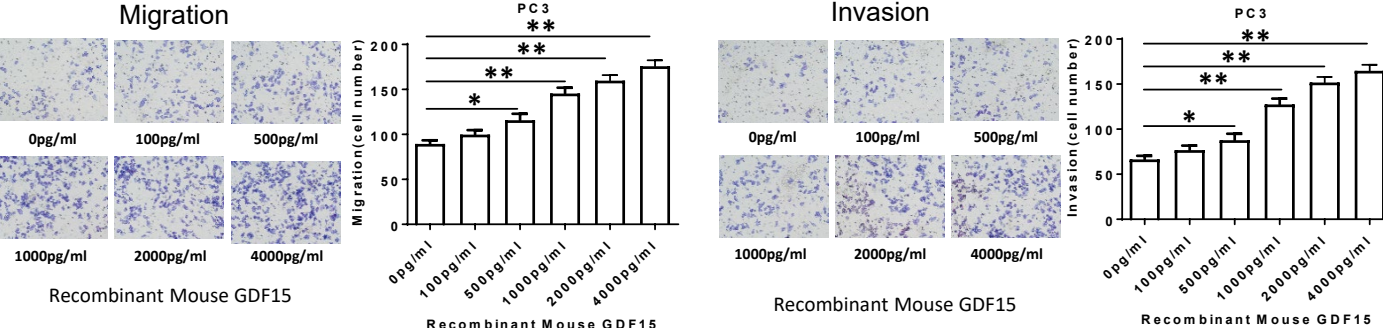

B

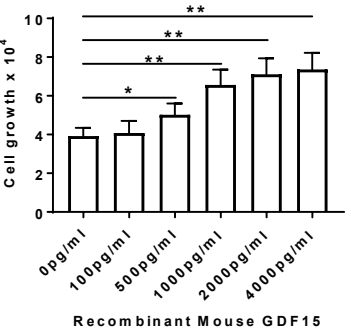

C

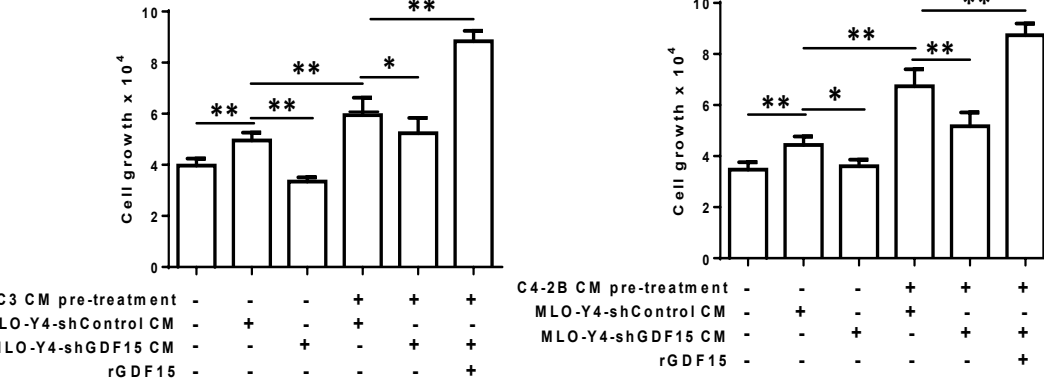

D

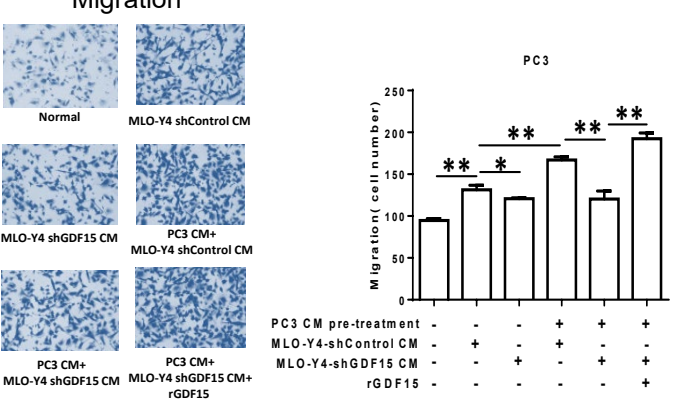

E

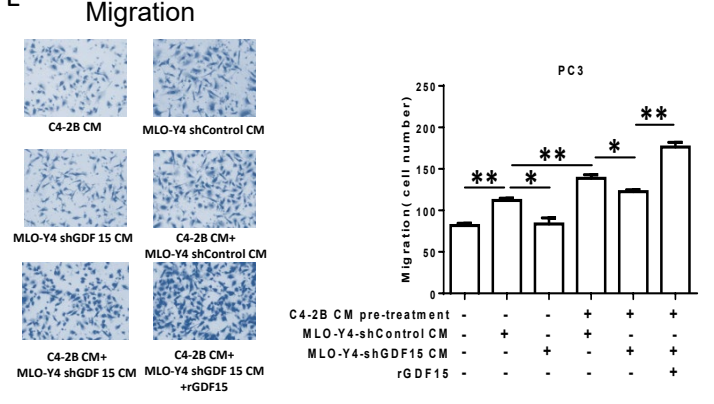

Invasion

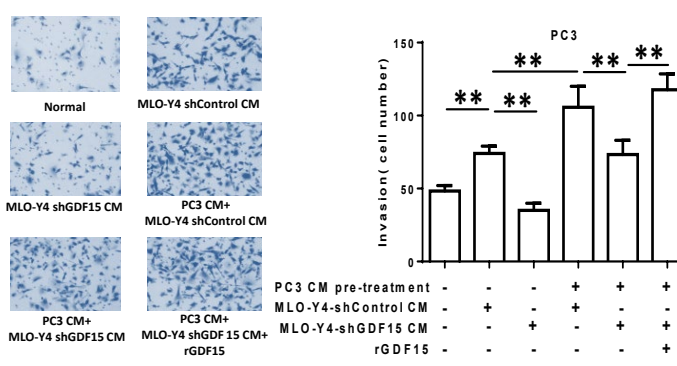

Invasion

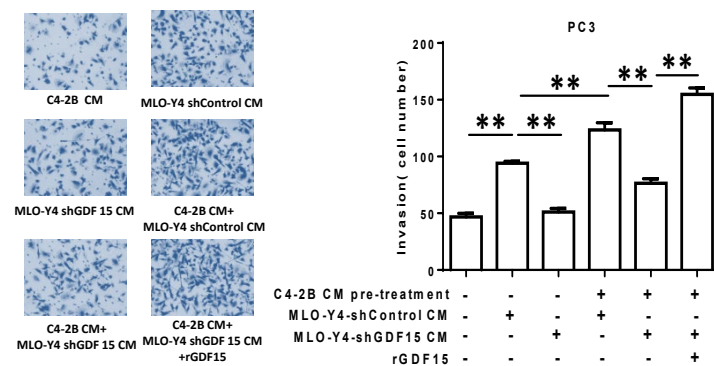

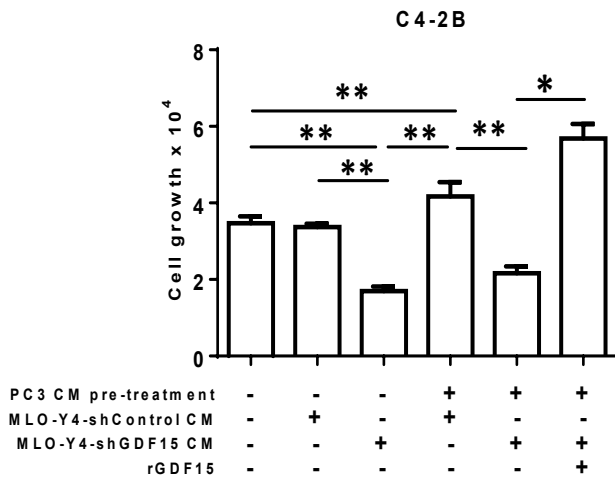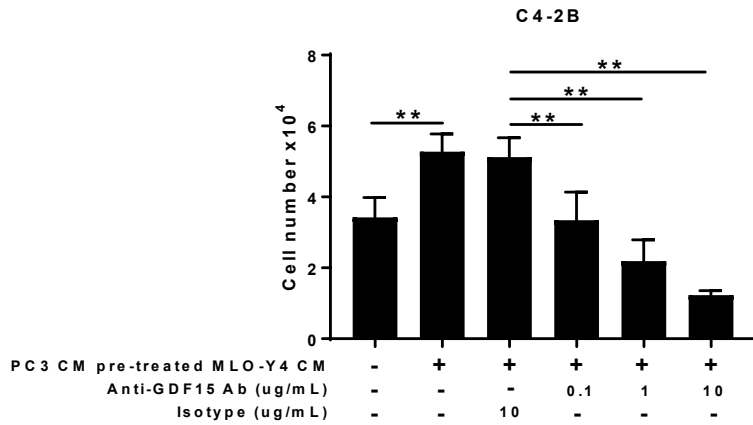

### Migration

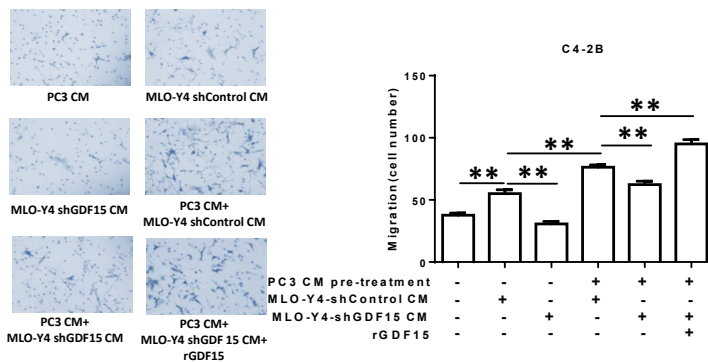

### Invasion

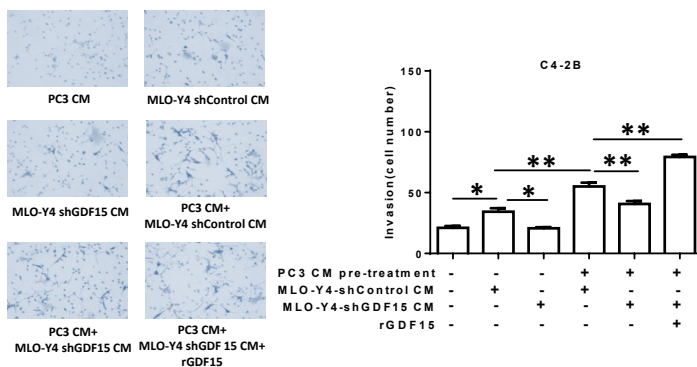

**Supp Fig 6**

|   | 1     | 2      | 3      | 4     | 5       | 6       | 7       | 8      | 9      | 10     | 11     | 12     |
|---|-------|--------|--------|-------|---------|---------|---------|--------|--------|--------|--------|--------|
| A | ACTR2 | AKT1   | AKT2   | AKT3  | ARAF    | ATF1    | ATF2    | BAD    | BCAR1  | BCL2   | BRAF   | CASP3  |
| B | CASP9 | CBL    | CCND1  | CHUK  | COL1A1  | CREB1   | CSNK2A1 | CSNK2B | DUSP1  | DUSP6  | EGF    | EGFR   |
| C | EGR1  | EIF4E  | ELK1   | EPS8  | FASLG   | FN1     | FOS     | FOXO3  | GAB1   | GRB2   | GSK3A  | GSK3B  |
| D | HBEGF | HRAS   | IKBKB  | IL2   | JAK1    | JUN     | KRAS    | LTA    | MAP2K1 | MAP2K4 | MAP2K7 | MAP3K2 |
| E | MAPK1 | MAPK10 | MAPK3  | MAPK8 | MAPK9   | MKNK1   | MMP7    | NCK2   | NFATC3 | NFKB1  | NRAS   | NUP62  |
| F | PDGFA | PDGFB  | PDGFRA | PDPK1 | PIK3CA  | PIK3R1  | PIK3R2  | PLAT   | PLCG1  | PPP2CA | PRKCA  | PTEN   |
| G | RAF1  | RAP1A  | RASA1  | RHOA  | RPS6KA5 | RPS6KB1 | SHC1    | SRC    | STAT1  | STAT3  | STAT5A | TP53   |

Supp Fig 7.

A

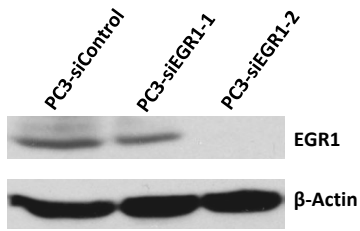

B

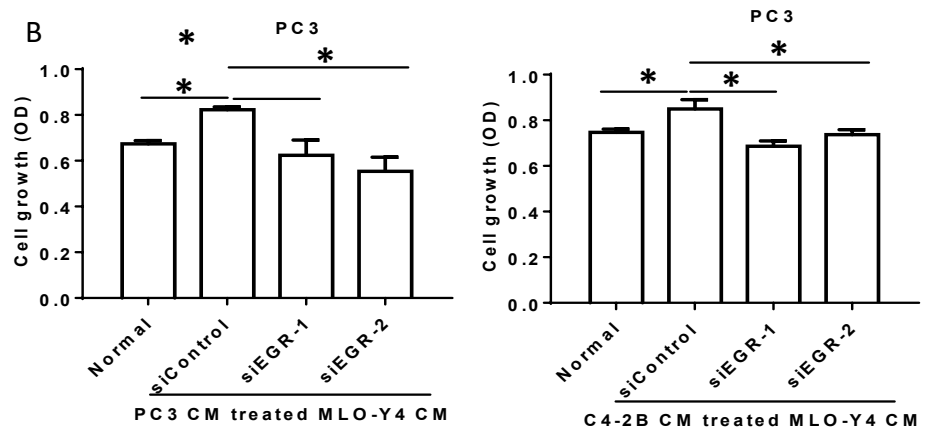

C

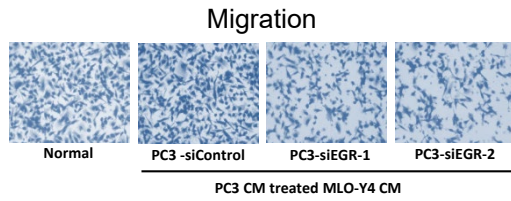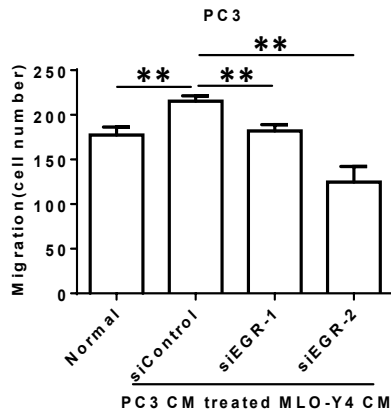

D

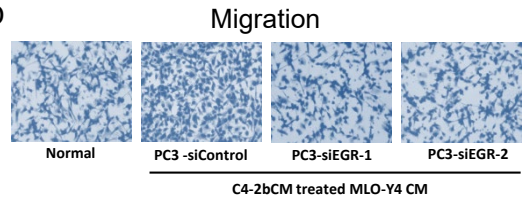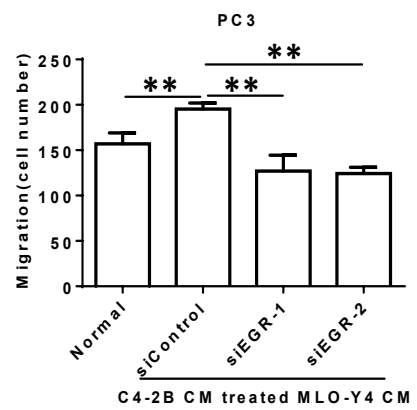

Invasion

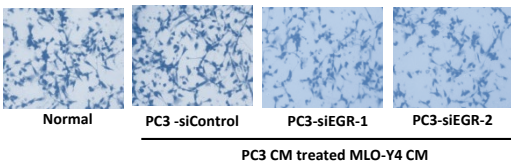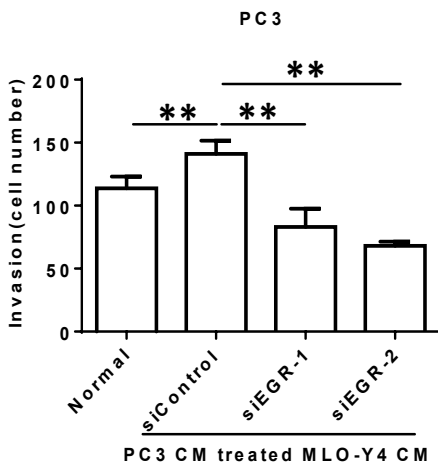

Invasion

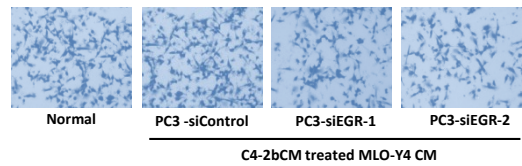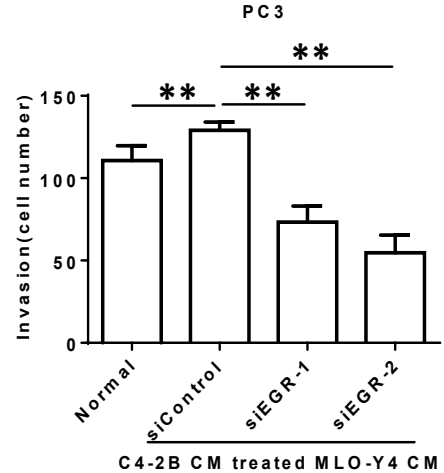

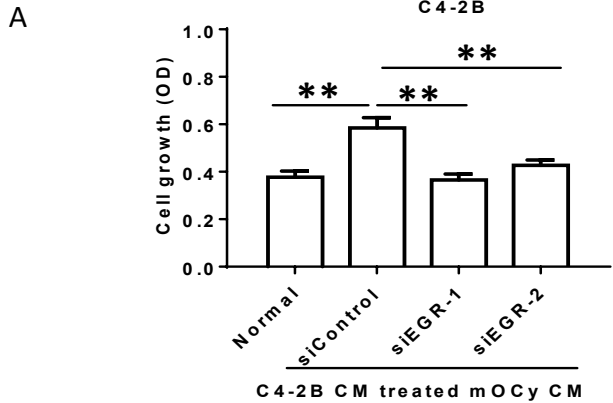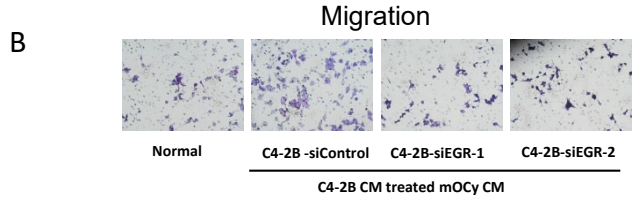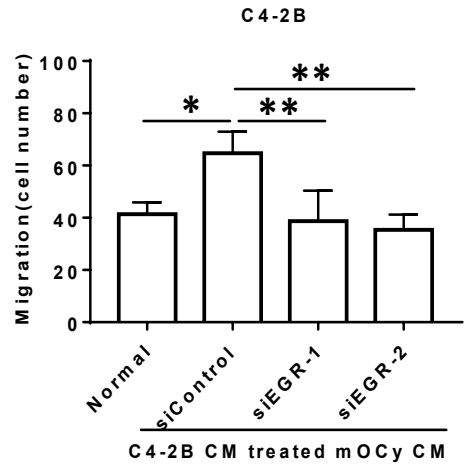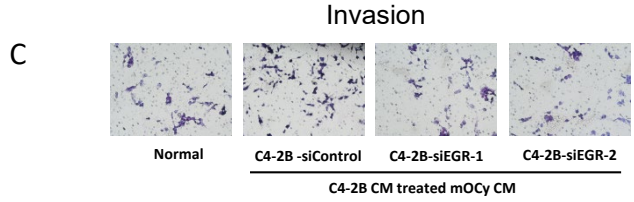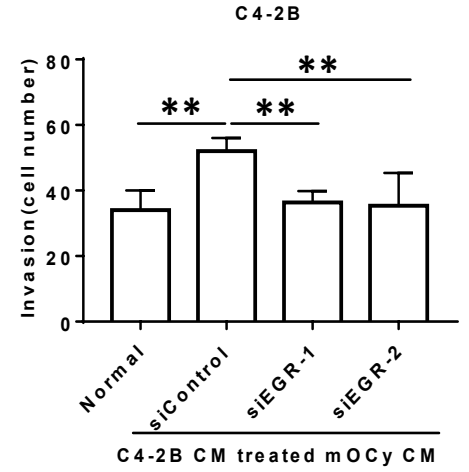

Supplement: NIHMS1804544-supplement-Supplemental_Figures.pdf [file NIHMS1804544-supplement-Supplemental_Figures.pdf]
